# Supplementary material for: Boundary layer structure characteristics under objective classification of persistent pollution weather types in the Beijing area
Source: Copernicus journal article supplement (doi:10.5194/acp-21-8863-2021), 2021-06-11
Supplement: Supplementary file 1 [file acp-21-8863-2021-supplement.pdf]

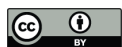

*Supplement of*

## **Boundary layer structure characteristics under objective classification of persistent pollution weather types in the Beijing area**

**Zhaobin Sun et al.**

*Correspondence to:* Xiujuan Zhao (xjzhao@ium.cn)

The copyright of individual parts of the supplement might differ from the article licence.

Table S1. Characterization of the thermal and dynamic features of the four weather types

|                                                                         | type 1                      | type 2                      | type 3                        | type 4                         |
|-------------------------------------------------------------------------|-----------------------------|-----------------------------|-------------------------------|--------------------------------|
| Top of inversion layer                                                  | 825 hPa                     | 750 hPa                     | 950hPa                        | 750 hPa                        |
| Vertical wind speed<br>(850 hpa to the ground)                          | ↑                           | ↑                           | ↓                             | ↑                              |
| Horizontal wind direction and<br>maximum speed<br>(500 m to the ground) | S,SE<br>8 m s <sup>-1</sup> | S,E<br>6 m s <sup>-1</sup>  | S,SW,E<br>6 m s <sup>-1</sup> | N,S,SSW<br>4 m s <sup>-1</sup> |
| Horizontal wind direction and<br>maximum speed<br>(500 m to 1500m)      | SW<br>8 m s <sup>-1</sup>   | W,SW<br>8 m s <sup>-1</sup> | NW<br>14 m s <sup>-1</sup>    | W,NW,SW<br>6 m s <sup>-1</sup> |
